# Supplementary material for: COVID-19 Vaccine Mandates: Attitudes and Effects on Holdouts in a Large Australian University Population
Source: MDPI journal article supplement (doi:10.3390/ijerph191610130), 2022-08-16

## Background

---

### Which best describes your primary role at UWA?

Academic staff

Professional staff

Undergraduate student

Postgraduate student

Other (please indicate below)

---

### At which Campus are you mainly based:

Crawley (main)

Nedlands

Queen Elizabeth II Medical Centre

Albany

Other

---

### What is your age?

Under 18

18 - 24

25 - 34

35 - 44

45 - 54

55 - 64

65 - 74

75 - 84

85 or older

Prefer not to say

---

### What gender do you identify as?

Male

Female

Non-binary / third gender

Prefer not to say

---

**Do you have a health condition that makes you more susceptible to COVID-19 (such as immune comprising conditions or treatments, as well as pregnancy)?**

No

Yes

---

**If you are happy to provide this information, please share the health condition that makes you more susceptible to COVID-19 (otherwise leave blank)**

---

### **Vaccination status**

**Regarding your COVID-19 vaccination status, the following questions are about Therapeutic Goods Administration (TGA) approved COVID-19 vaccines.**

**Please indicate which of the following is true - I have/am:**

- a) Received both first and second doses of a COVID-19 vaccine
  - b) Received the first dose of a COVID-19 vaccine and plan to get a second dose
  - c) Received the first dose but do not plan to receive any more doses
  - d) Booked or plan to receive the first dose of a COVID-19 vaccine
  - e) Obtained formal medical exemption from COVID-19 vaccination via the Australian Immunisation Register (AIR)
  - f) Not intending to get vaccinated against COVID-19 for my own reasons
  - g) Undecided about whether to be vaccinated against COVID-19
  - h) I opt to not disclose my vaccination status
- 

**Regarding booster shots, I am:**

- a) Willing to get booster shots
  - b) Not willing to get booster shots
  - c) Not sure whether I am willing to get booster shots
- 

**What are your main reasons for this decision?**

## Mandate perception

---

**Would you support a mandate by the WA Government that requires everyone attending campus to be vaccinated, if they are able to be?**

Strongly oppose   Somewhat oppose   Neutral   Somewhat support   Strongly support

---

**What are the main reasons for your position?**

**In the absence of a government mandate, would you support a mandate by the University that requires everyone attending campus to be vaccinated, if they are able to be?**

Strongly oppose   Somewhat oppose   Neutral   Somewhat support   Strongly support

---

**What are the main reasons for your position?**

## Factors impacting vaccine likelihood

---

**How would each of the following impact the likelihood that you will get vaccinated for COVID-19:**

|                                                                                                           | Decrease likelihood   | No change in likelihood | Increase likelihood   |
|-----------------------------------------------------------------------------------------------------------|-----------------------|-------------------------|-----------------------|
| An information session about COVID-19 vaccines with scientific experts                                    | <input type="radio"/> | <input type="radio"/>   | <input type="radio"/> |
| International border opening                                                                              | <input type="radio"/> | <input type="radio"/>   | <input type="radio"/> |
| State border opening                                                                                      | <input type="radio"/> | <input type="radio"/>   | <input type="radio"/> |
| A mandate policy where job loss or exclusion from study is a consequence of refusing COVID-19 vaccination | <input type="radio"/> | <input type="radio"/>   | <input type="radio"/> |

---

## Vaccine beliefs

---

The following questions are about your beliefs relating to COVID-19 vaccinations on campus.

To what extent do you agree/disagree with the following statements:

---

**a) "I feel safer coming to campus if others are vaccinated"**

|                   |                   |                            |                |                |
|-------------------|-------------------|----------------------------|----------------|----------------|
| Strongly disagree | Somewhat disagree | Neither agree nor disagree | Somewhat agree | Strongly agree |
|-------------------|-------------------|----------------------------|----------------|----------------|

---

**b) "People should be able to attend campus even if they choose not to vaccinate"**

|                   |                   |                            |                |                |
|-------------------|-------------------|----------------------------|----------------|----------------|
| Strongly disagree | Somewhat disagree | Neither agree nor disagree | Somewhat agree | Strongly agree |
|-------------------|-------------------|----------------------------|----------------|----------------|

---

**c) "I believe COVID vaccines are safe, effective and necessary"**

|                   |                   |                            |                |                |
|-------------------|-------------------|----------------------------|----------------|----------------|
| Strongly disagree | Somewhat disagree | Neither agree nor disagree | Somewhat agree | Strongly agree |
|-------------------|-------------------|----------------------------|----------------|----------------|

---

**d) "The government should mandate COVID-19 vaccinations for the wider community to work, travel, or attend events / hospitality venues"**

|                   |                   |                            |                |                |
|-------------------|-------------------|----------------------------|----------------|----------------|
| Strongly disagree | Somewhat disagree | Neither agree nor disagree | Somewhat agree | Strongly agree |
|-------------------|-------------------|----------------------------|----------------|----------------|

---

**e) "People should be exempt from vaccine mandates for religious or personal belief reasons"**

|                   |                   |                            |                |                |
|-------------------|-------------------|----------------------------|----------------|----------------|
| Strongly disagree | Somewhat disagree | Neither agree nor disagree | Somewhat agree | Strongly agree |
|-------------------|-------------------|----------------------------|----------------|----------------|

---

**f) "UWA staff and students who refuse to vaccinate should lose their positions."**

|                   |                   |                            |                |                |
|-------------------|-------------------|----------------------------|----------------|----------------|
| Strongly disagree | Somewhat disagree | Neither agree nor disagree | Somewhat agree | Strongly agree |
|-------------------|-------------------|----------------------------|----------------|----------------|

---

**g) "Each individual has a duty to vaccinate to protect those we work or study with"**

|                   |                   |                            |                |                |
|-------------------|-------------------|----------------------------|----------------|----------------|
| Strongly disagree | Somewhat disagree | Neither agree nor disagree | Somewhat agree | Strongly agree |
|-------------------|-------------------|----------------------------|----------------|----------------|

---

## Further comments

---

**Do you have any further comments about the University potentially mandating COVID- 19 vaccinations?**

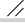

Supplement: s1 [file s1]
