# Supplementary material for: COVID-19 Vaccine Mandates: Attitudes and Effects on Holdouts in a Large Australian University Population
Source: MDPI journal article supplement (doi:10.3390/ijerph191610130), 2022-08-16
Supplement: s1 [file s1]

### Supplementary Materials Tables S3-6.

#### Participants' Vaccination Status (Double Vaccinated or Willing To Be, DVWTB) by Demographic Variables

**Table S3. Vaccination Status as a function of Gender**

Contingency Tables

| Gender                    |              | Vaccination Status (DVWTB) |        | Total   |
|---------------------------|--------------|----------------------------|--------|---------|
|                           |              | No                         | Yes    |         |
| Female                    | Observed     | 99                         | 1536   | 1635    |
|                           | % within row | 6.1 %                      | 93.9 % | 100.0 % |
| Male                      | Observed     | 96                         | 1073   | 1169    |
|                           | % within row | 8.2 %                      | 91.8 % | 100.0 % |
| Non-binary / third gender | Observed     | 3                          | 30     | 33      |
|                           | % within row | 9.1 %                      | 90.9 % | 100.0 % |
| Prefer not to say         | Observed     | 18                         | 23     | 41      |
|                           | % within row | 43.9 %                     | 56.1 % | 100.0 % |
| Total                     | Observed     | 216                        | 2662   | 2878    |
|                           | % within row | 7.5 %                      | 92.5 % | 100.0 % |

**Table S4. Vaccination Status as a function of Age**

Contingency Tables

| Age               |              | Vaccination Status (DVWTB) |         | Total   |
|-------------------|--------------|----------------------------|---------|---------|
|                   |              | No                         | Yes     |         |
| 18 - 24           | Observed     | 99                         | 1059    | 1158    |
|                   | % within row | 8.5 %                      | 91.5 %  | 100.0 % |
| 25 - 34           | Observed     | 38                         | 503     | 541     |
|                   | % within row | 7.0 %                      | 93.0 %  | 100.0 % |
| 35 - 44           | Observed     | 35                         | 410     | 445     |
|                   | % within row | 7.9 %                      | 92.1 %  | 100.0 % |
| 45 - 54           | Observed     | 19                         | 328     | 347     |
|                   | % within row | 5.5 %                      | 94.5 %  | 100.0 % |
| 55 - 64           | Observed     | 12                         | 248     | 260     |
|                   | % within row | 4.6 %                      | 95.4 %  | 100.0 % |
| 65 - 74           | Observed     | 0                          | 85      | 85      |
|                   | % within row | 0.0 %                      | 100.0 % | 100.0 % |
| 75 - 84           | Observed     | 0                          | 8       | 8       |
|                   | % within row | 0.0 %                      | 100.0 % | 100.0 % |
| 85 or older       | Observed     | 0                          | 4       | 4       |
|                   | % within row | 0.0 %                      | 100.0 % | 100.0 % |
| Prefer not to say | Observed     | 11                         | 9       | 20      |
|                   | % within row | 55.0 %                     | 45.0 %  | 100.0 % |
| Under 18          | Observed     | 2                          | 8       | 10      |
|                   | % within row | 20.0 %                     | 80.0 %  | 100.0 % |
| Total             | Observed     | 216                        | 2662    | 2878    |
|                   | % within row | 7.5 %                      | 92.5 %  | 100.0 % |

**Table S5. Vaccination Status as a function of Occupation**

Contingency Tables

| Occupation                    |              | Vaccination Status (DVWTB) |        | Total   |
|-------------------------------|--------------|----------------------------|--------|---------|
|                               |              | No                         | Yes    |         |
| Academic staff                | Observed     | 6                          | 386    | 392     |
|                               | % within row | 1.5 %                      | 98.5 % | 100.0 % |
| Other (please indicate below) | Observed     | 22                         | 62     | 84      |
|                               | % within row | 26.2 %                     | 73.8 % | 100.0 % |
| Postgraduate student          | Observed     | 66                         | 741    | 807     |
|                               | % within row | 8.2 %                      | 91.8 % | 100.0 % |
| Professional staff            | Observed     | 30                         | 535    | 565     |
|                               | % within row | 5.3 %                      | 94.7 % | 100.0 % |
| Undergraduate student         | Observed     | 92                         | 938    | 1030    |
|                               | % within row | 8.9 %                      | 91.1 % | 100.0 % |
| Total                         | Observed     | 216                        | 2662   | 2878    |
|                               | % within row | 7.5 %                      | 92.5 % | 100.0 % |

**Table S6. Vaccination Status as a function of Health Status**

Contingency Tables

| Underlying Health Condition |              | Vaccination Status (DVWTB) |        | Total   |
|-----------------------------|--------------|----------------------------|--------|---------|
|                             |              | No                         | Yes    |         |
| No                          | Observed     | 194                        | 2425   | 2619    |
|                             | % within row | 7.4 %                      | 92.6 % | 100.0 % |
| Yes                         | Observed     | 22                         | 237    | 259     |
|                             | % within row | 8.5 %                      | 91.5 % | 100.0 % |
| Total                       | Observed     | 216                        | 2662   | 2878    |
|                             | % within row | 7.5 %                      | 92.5 % | 100.0 % |
