# Supplementary material for: COVID-19 Vaccine Mandates: Attitudes and Effects on Holdouts in a Large Australian University Population
Source: MDPI journal article supplement (doi:10.3390/ijerph191610130), 2022-08-16
Supplement: s1 [file s1]

| Supplementary Table S2: Comorbidities self-identified by participants |                                      |                                                                                                  |                                                                                                                                                                             |                                                                                                                                                                 |                                                                  |                                                              |
|-----------------------------------------------------------------------|--------------------------------------|--------------------------------------------------------------------------------------------------|-----------------------------------------------------------------------------------------------------------------------------------------------------------------------------|-----------------------------------------------------------------------------------------------------------------------------------------------------------------|------------------------------------------------------------------|--------------------------------------------------------------|
| Type 1 Diabetes                                                       | Immune suppressant medication        | Thyroidectomy following acute autoimmune thyroiditis, primary parahyperthyroidis, severe asthma. | Sarcoidosis                                                                                                                                                                 | Myasthenia gravis                                                                                                                                               | MCTD                                                             | In recovery from thyroid cancer                              |
| Pregnancy                                                             | Underactive thyroid function         | Susceptible to bronchitis. Have had pneumonia but not hospitalised. Just tend to get coughs!     | Respiratory illness, weak immune response to respiratory diseases.                                                                                                          | myalgic encephalomyelitis                                                                                                                                       | Mannose-Binding-Lectin (MBL) deficiency                          | Immunocompromised (liver transplant)                         |
| Rheumatoid Arthritis (+ on immunomodulators)                          | Ulcerative colitis                   | Stomach issues and lowered immunity                                                              | Pulmonary stenosis                                                                                                                                                          | My biggest health condition makes me susceptible to infections which puts extra pressure on my immune system, in turn making me more likely to contract viruses | Lymphoedema after breast cancer                                  | Immune suppressant medication for Crohn's disease treatment. |
| Psoriatic arthritis                                                   | Ulcerative colitis and endometriosis | Crohn's disease                                                                                  | Pneumonia in both lungs as a child. Asthma and anaphylaxis which is an issue considering the COVID vaccines (which can make me more susceptible) plus immune system issues. | Moderate idiopathic hypertension, controlled by 40mg Telmisartan, 10mg Amlodipine once daily                                                                    | Lung scarring from childhood whooping cough and pneumonia        | IgA deficiency                                               |
| Lupus                                                                 | High blood pressure/allergies        | Coeliac                                                                                          | Overweight/Obesity                                                                                                                                                          | Mitral valve prolapse                                                                                                                                           | Juvenile Rheumatoid Arthritis – on immunosuppressant treatments. |                                                              |
