# Supplementary material for: COVID-19 Vaccine Mandates: Attitudes and Effects on Holdouts in a Large Australian University Population
Source: MDPI journal article supplement (doi:10.3390/ijerph191610130), 2022-08-16
Supplement: s1 [file s1]

**Supplementary Table S1. Participant demographics.**

|                   |        |
|-------------------|--------|
| Gender            |        |
| Female            | 56.81% |
| Male              | 40.62% |
| Non-binary        | 1.15%  |
| Prefer not to say | 1.42%  |

|                   |        |
|-------------------|--------|
| Age               |        |
| 18 - 24           | 40.24% |
| 25 - 34           | 18.80% |
| 35 - 44           | 15.46% |
| 45 - 54           | 12.06% |
| 55 - 64           | 9.03%  |
| 65 - 74           | 2.95%  |
| 75 - 84           | 0.28%  |
| 85 or older       | 0.14%  |
| Prefer not to say | 0.69%  |
| Under 18          | 0.35%  |

|                    |        |
|--------------------|--------|
| Occupation         |        |
| Undergraduate      | 35.79% |
| Postgraduate       | 28.04% |
| Professional staff | 19.63% |
| Academic staff     | 13.62% |
| Other              | 2.92%  |

|                             |        |
|-----------------------------|--------|
| Underlying Health Condition |        |
| No                          | 91.00% |
| Yes                         | 9.00%  |
