# Supplementary material for: COVID-19 Vaccine Mandates: Attitudes and Effects on Holdouts in a Large Australian University Population
Source: MDPI journal article supplement (doi:10.3390/ijerph191610130), 2022-08-16
Supplement: s1 [file s1]

**Supplementary Materials Tables S7-10.**

**Participants' Vaccination Status (Double Vaccinated or Willing To Be, DVWTB) by Demographic Variables**

**Table S7. Vaccination Status as a function of Gender**

Contingency Tables

| Gender                    |              | University Vaccine Mandate Stance |        |         | Total   |
|---------------------------|--------------|-----------------------------------|--------|---------|---------|
|                           |              | Neutral                           | Oppose | Support |         |
| Female                    | Observed     | 85                                | 196    | 1354    | 1635    |
|                           | % within row | 5.2 %                             | 12.0 % | 82.8 %  | 100.0 % |
| Male                      | Observed     | 68                                | 213    | 888     | 1169    |
|                           | % within row | 5.8 %                             | 18.2 % | 76.0 %  | 100.0 % |
| Non-binary / third gender | Observed     | 0                                 | 4      | 29      | 33      |
|                           | % within row | 0.0 %                             | 12.1 % | 87.9 %  | 100.0 % |
| Prefer not to say         | Observed     | 2                                 | 25     | 14      | 41      |
|                           | % within row | 4.9 %                             | 61.0 % | 34.1 %  | 100.0 % |
| Total                     | Observed     | 155                               | 438    | 2285    | 2878    |
|                           | % within row | 5.4 %                             | 15.2 % | 79.4 %  | 100.0 % |

**Table S8. Vaccination Status as a function of Age**

## Contingency Tables

|                   |              | University Vaccine Mandate Stance |        |         | Total   |
|-------------------|--------------|-----------------------------------|--------|---------|---------|
|                   |              | Neutral                           | Oppose | Support |         |
| 18 - 24           | Observed     | 67                                | 199    | 892     | 1158    |
|                   | % within row | 5.8 %                             | 17.2 % | 77.0 %  | 100.0 % |
| 25 - 34           | Observed     | 35                                | 89     | 417     | 541     |
|                   | % within row | 6.5 %                             | 16.5 % | 77.1 %  | 100.0 % |
| 35 - 44           | Observed     | 24                                | 71     | 350     | 445     |
|                   | % within row | 5.4 %                             | 16.0 % | 78.7 %  | 100.0 % |
| 45 - 54           | Observed     | 16                                | 38     | 293     | 347     |
|                   | % within row | 4.6 %                             | 11.0 % | 84.4 %  | 100.0 % |
| 55 - 64           | Observed     | 10                                | 24     | 226     | 260     |
|                   | % within row | 3.8 %                             | 9.2 %  | 86.9 %  | 100.0 % |
| 65 - 74           | Observed     | 2                                 | 1      | 82      | 85      |
|                   | % within row | 2.4 %                             | 1.2 %  | 96.5 %  | 100.0 % |
| 75 - 84           | Observed     | 0                                 | 0      | 8       | 8       |
|                   | % within row | 0.0 %                             | 0.0 %  | 100.0 % | 100.0 % |
| 85 or older       | Observed     | 0                                 | 0      | 4       | 4       |
|                   | % within row | 0.0 %                             | 0.0 %  | 100.0 % | 100.0 % |
| Prefer not to say | Observed     | 0                                 | 12     | 8       | 20      |
|                   | % within row | 0.0 %                             | 60.0 % | 40.0 %  | 100.0 % |
| Under 18          | Observed     | 1                                 | 4      | 5       | 10      |
|                   | % within row | 10.0 %                            | 40.0 % | 50.0 %  | 100.0 % |
| Total             | Observed     | 155                               | 438    | 2285    | 2878    |
|                   | % within row | 5.4 %                             | 15.2 % | 79.4 %  | 100.0 % |

**Table S9. Vaccination Status as a function of Occupation**

Contingency Tables

| Occupation                    |              | University Vaccine Mandate Stance |        |         | Total   |
|-------------------------------|--------------|-----------------------------------|--------|---------|---------|
|                               |              | Neutral                           | Oppose | Support |         |
| Academic staff                | Observed     | 16                                | 35     | 341     | 392     |
|                               | % within row | 4.1 %                             | 8.9 %  | 87.0 %  | 100.0 % |
| Other (please indicate below) | Observed     | 2                                 | 29     | 53      | 84      |
|                               | % within row | 2.4 %                             | 34.5 % | 63.1 %  | 100.0 % |
| Postgraduate student          | Observed     | 50                                | 128    | 629     | 807     |
|                               | % within row | 6.2 %                             | 15.9 % | 77.9 %  | 100.0 % |
| Professional staff            | Observed     | 33                                | 60     | 472     | 565     |
|                               | % within row | 5.8 %                             | 10.6 % | 83.5 %  | 100.0 % |
| Undergraduate student         | Observed     | 54                                | 186    | 790     | 1030    |
|                               | % within row | 5.2 %                             | 18.1 % | 76.7 %  | 100.0 % |
| Total                         | Observed     | 155                               | 438    | 2285    | 2878    |
|                               | % within row | 5.4 %                             | 15.2 % | 79.4 %  | 100.0 % |

**Table S10. Vaccination Status as a function of Health Status**

Contingency Tables

| Underlying Health Condition |              | University Vaccine Mandate Stance |        |         | Total   |
|-----------------------------|--------------|-----------------------------------|--------|---------|---------|
|                             |              | Neutral                           | Oppose | Support |         |
| No                          | Observed     | 143                               | 399    | 2077    | 2619    |
|                             | % within row | 5.5 %                             | 15.2 % | 79.3 %  | 100.0 % |
| Yes                         | Observed     | 12                                | 39     | 208     | 259     |
|                             | % within row | 4.6 %                             | 15.1 % | 80.3 %  | 100.0 % |
| Total                       | Observed     | 155                               | 438    | 2285    | 2878    |
|                             | % within row | 5.4 %                             | 15.2 % | 79.4 %  | 100.0 % |
