# Supplementary material for: COVID-19 Vaccine Mandates: Attitudes and Effects on Holdouts in a Large Australian University Population
Source: Int J Environ Res Public Health. 2022 Aug 16;19(16):10130. doi: 10.3390/ijerph191610130 (PMC9408755; doi:10.3390/ijerph191610130)
Supplement: Supplementary file 1 [file ijerph-19-10130-s001.zip]

Archive with 5 entries (5 files):
- ijerph-1807366-supplementary.pdf
- Supplementary Table S1 Participant demographics.pdf
- Supplementary Table S2 Comorbidity List.pdf
- Supplementary Tables S3-6 Vax Status Demographic.pdf
- Supplementary Tables S7-10 Uni Mand Stance Demographic.pdf
